# Supplementary material
Source: PubMed Central journal article supplement (PMC5544290)
Supplement: pnas.1701777114.sapp.pdf [file pnas.1701777114.sapp.pdf]

# Supporting Information Appendix

1  
2  
3  
4  
5  
6  
7  
8  
9  
10  
11  
12  
13  
14  
15  
16  
17  
18  
19  
20  
21  
22

SI Materials and Methods.....

SI References.....

SI Figures.....

    Fig. S1.....

    Fig. S2.....

    Fig. S3.....

    Fig. S4.....

    Fig. S5.....

    Fig. S6.....

    Fig. S7.....

    Fig. S8.....

SI Tables.....

    Table S1.....

    Table S2.....

    Table S3.....

## 23 **SI Materials and Methods**

24 **Data collection.** As HFRS is a severe viral disease in China, strict criteria were  
25 applied in both the clinical diagnosis and reporting (1). Since 1950, HFRS has been  
26 listed as a notifiable disease, and all cases are required by law to be reported to the  
27 China Center for Disease Control and Prevention. Before the 1980s, HFRS cases were  
28 defined by a national standard of clinical criteria in our study area; since the 1980s,  
29 cases were also confirmed by detecting antibodies against hantavirus in patients'  
30 serum samples (2, 3).

31  
32 A clinical confirmed case of HFRS was defined as a person who had 1) traveled to the  
33 HFRS endemic area or who had come into contact with rodent feces, saliva, and/or  
34 urine within 2 months before the onset of illness, 2) who had an acute illness  
35 characterized by abrupt onset and presented the following clinical features: fever,  
36 chills, hemorrhage, headache, back pain, abdominal pain, acute renal dysfunction,  
37 hypotension, and 3) must exhibit five distinct disease phases: the pyretogenesis phase,  
38 shock phase, oliguria phase, diuretic phase, and recovery phase.

39  
40 We also conducted the analysis using the dataset from 1980–2013. The results  
41 consistently supported our previous analysis (Fig. 1C), and the time series of HFRS  
42 incidence and rodent population density showed interannual oscillations of 8–10 years  
43 (*SI Appendix*, Fig. S7).

45 **Wavelet coherence.** The wavelet coherence is a useful tool to analyze patterns of  
 46 co-variation between two time series (4) and has been used to quantify the  
 47 non-stationary relationship between HFRS time series, capture rate, and climate  
 48 variables:

$$50 \quad S_x(f, t) = \|W_x(f, t)\|^2 \quad [1]$$

51

$$52 \quad C_{xy}(f, t) = \left( \frac{\|\langle W_{xy}(f, t) \rangle\|}{\|\langle W_x(f, t) \rangle\|^2 \cdot \|\langle W_y(f, t) \rangle\|^2} \right)^{1/2} \quad [2]$$

53

54 where  $W_{xy}(f, t) = W(f, t) \cdot W_x^*(f, t)$  is the wavelet cross-spectrum, \* denoting the  
 55 complex conjugate.

56

57 To account for the interactions between local and global climatic variables on the  
 58 HFRS dynamics, the partial wavelet coherence was used. The partial wavelet  
 59 coherence, a technique similar to partial correlation, can identify the resulting wavelet  
 60 coherence between two time series after eliminating the influence of a third common  
 61 dependence (5). The partial wavelet coherence between  $x(t)$  and  $y(t)$  corrected by the  
 62 coherence of  $z(t)$  reads:

63

$$64 \quad PC_{xy|z}(f, t) = \frac{\|C_{xy}(f, t) - C_{xz}(f, t) \cdot C_{yz}^*(f, t)\|^2}{\|1 - C_{xz}(f, t)\|^2 \cdot \|1 - C_{yz}(f, t)\|^2} \quad [3]$$

65

66 Analyses were performed using Matlab (version 6.5; MathWorks Inc., Natick, MA,  
67 USA).

68

## 69 **SI References**

- 70 1. Zhang YZ, Zou Y, Fu ZF, & Plyusnin A (2010) Hantavirus infections in humans and animals,  
71 China. *Emerg Infect Dis* 16(8):1195-1203.
- 72 2. Yu P, *et al.* (2015) Hantavirus infection in rodents and haemorrhagic fever with renal  
73 syndrome in Shaanxi province, China, 1984–2012. *Epidemiol Infect* 143(2):405-411.
- 74 3. Tian H, *et al.* (2017) Anthropogenically driven environmental changes shift the ecological  
75 dynamics of hemorrhagic fever with renal syndrome. *PLoS Pathog* 13(1):e1006198.
- 76 4. Cazelles B, Chavez M, de Magny GC, Guégan J-F, & Hales S (2007) Time-dependent spectral  
77 analysis of epidemiological time-series with wavelets. *J R Soc Interface* 4(15):625-636.
- 78 5. Ng EK & Chan JC (2012) Geophysical applications of partial wavelet coherence and multiple  
79 wavelet coherence. *J Atmos Ocean Technol* 29(12):1845-1853.

80

81

82 **SI Figures**

83

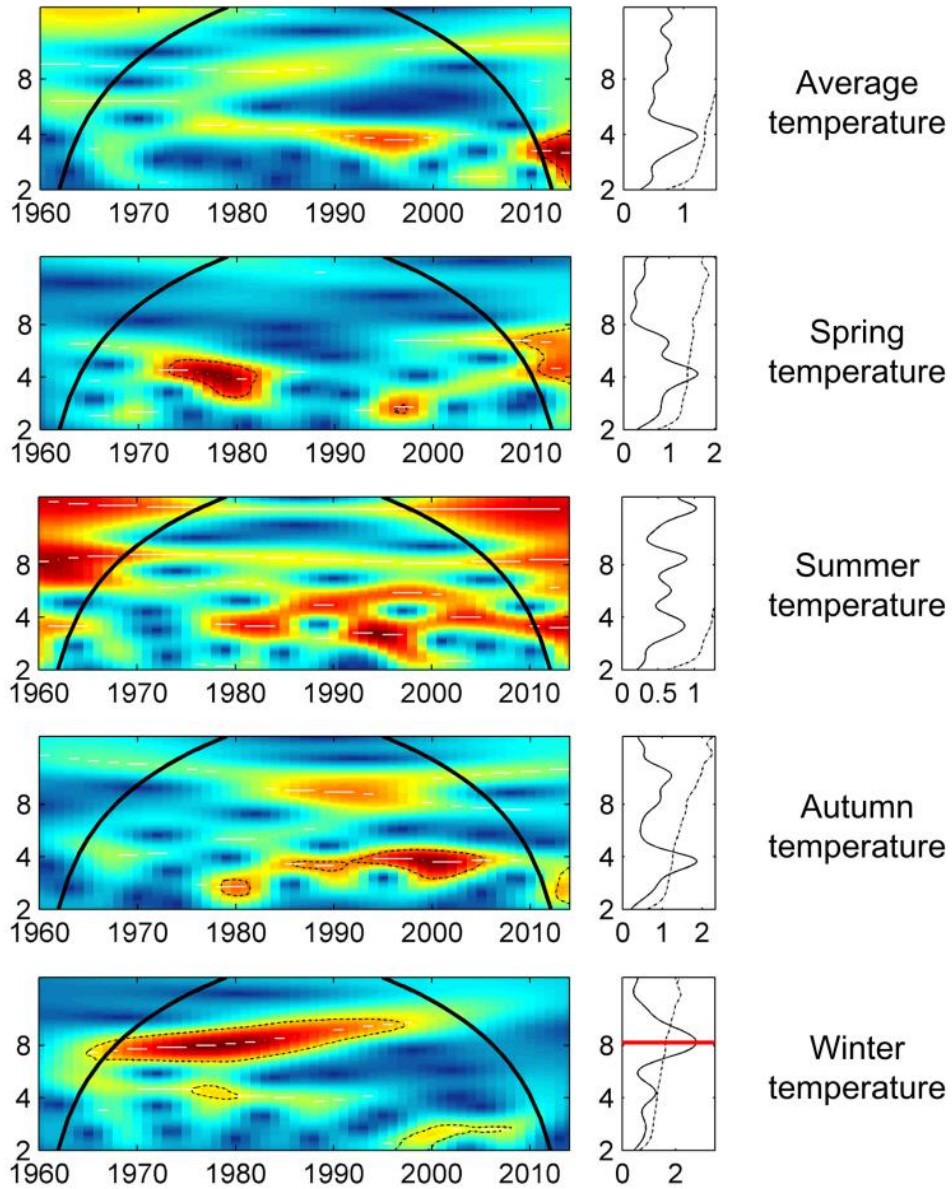

84

85 **Fig. S1** Wavelet power spectra showing the periodicity of the average temperature,  
86 spring temperature, summer temperature, autumn temperature and winter temperature.

87

88

89

90

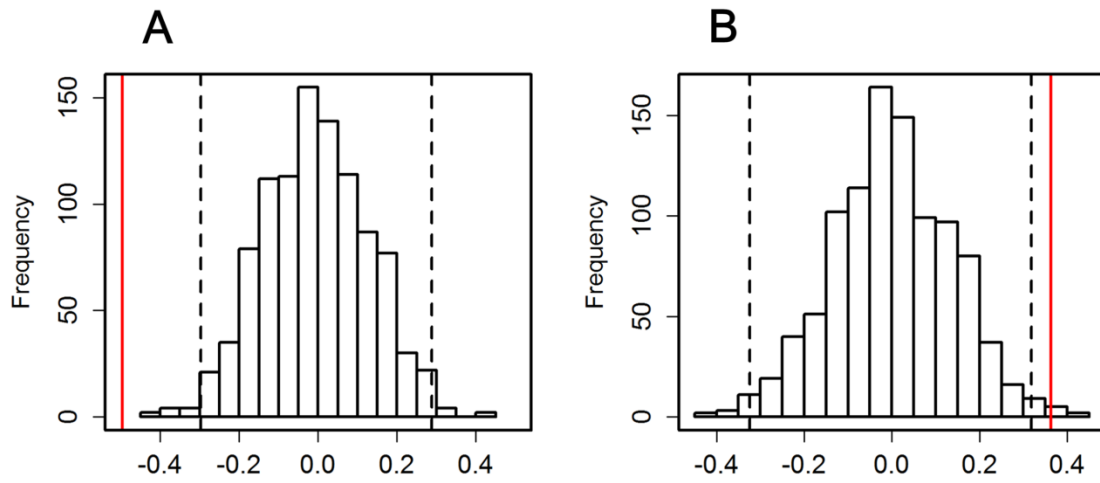

91

92 **Fig. S2** (A) Randomization tests of the correlation between the summer temperature

93 and the incidence of HFRS. (B) Randomization tests of the correlation between the

94 summer rainfall and the incidence of HFRS. The red line shows the observed

95 correlation, and the dashed lines the 95 percentiles for the correlations expected from

96 random permutations of the series.

97

98

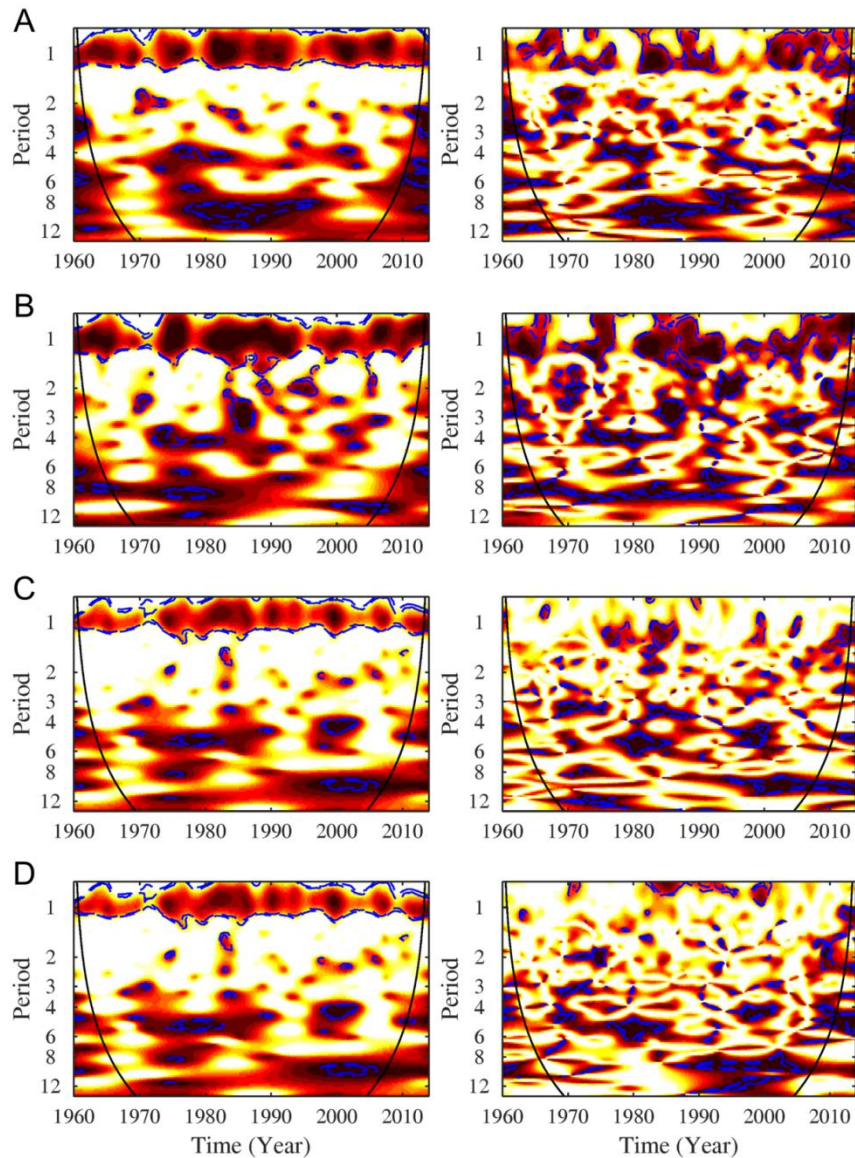

100

101 **Fig. S3** Wavelet coherence and partial wavelet coherence between HFRS and local  
 102 and global climate. Left panel: Wavelet Coherence; Right panel: Partial Wavelet  
 103 Coherence. (A) HFRS and temperature time series coherence (left panel) corrected by  
 104 the Nino3.4 index (right panel). (B) HFRS and rainfall time series coherence (left  
 105 panel) corrected by the Nino3.4 index (right panel). (C) HFRS and the Nino3.4 index  
 106 coherence (left panel) corrected by temperature time series (right panel). (D) HFRS  
 107 and the Nino3.4 index coherence (left panel) corrected by rainfall time series (right

108 panel). In the wavelet power spectra, the blue dotted lines correspond to the 5% and  
109 10% significance levels, and the bold line is known as the cone of influence. The cone  
110 of influence delimits the effect of the treatment of the boundaries, and the power  
111 values are color coded from white (low values) to dark red (high values). Our results  
112 clearly show that ENSO cannot explain the seasonal coherence between HFRS  
113 epidemics and climatic variables, further emphasizing that local climate is responsible  
114 for this statistically significant association. Indeed, this significant association for the  
115 seasonal mode does not disappear when local climate coherence is corrected for the  
116 ENSO index (*SI Appendix*, Fig. S4 A-B, right panel). Instead, when corrected by local  
117 climate (temperature or rainfall), the significant coherence between HFRS epidemics  
118 and ENSO vanishes (*SI Appendix*, Fig. S4 C-D, right panel). For multiannual  
119 components (mainly following a 8-10 year cycle) the situation appears more complex,  
120 as a significant relationship for these components persists more or less in the partial  
121 wavelet coherency (*SI Appendix*, Fig. S4). This demonstrates that both local and  
122 global climate conditions influence the multiannual associations with HFRS  
123 epidemics, and indicates that the dynamical effects of wildlife propagation are  
124 dependent on climate-linked multiannual processes.

125

126



127

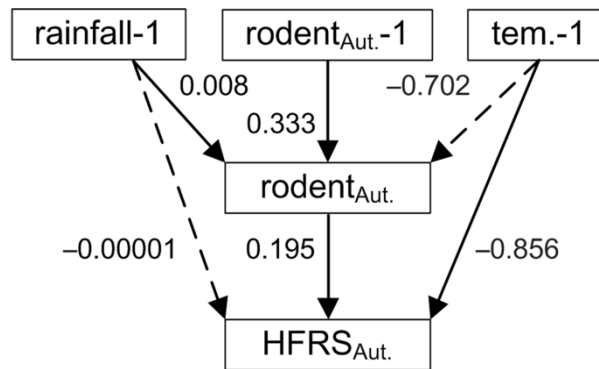

128

129 **Fig. S4** Structure and results from our structural equation models for climate-linked  
130 peak season of HFRS epidemics. Values associated with arrows represent  
131 standardized path coefficients. The dashed lines represent nonsignificant paths; -1,  
132 previous year; rainfall, total annual rainfall; tem., mean annual temperature; rodent<sub>Aut.</sub>,  
133 capture rate of *A. agrarius* in autumn; HFRS<sub>Aut.</sub>, incidence of HFRS in autumn.  
134 Rainfall has an indirect positive effect via rodents on HFRS epidemics ( $P < 0.05$ ).

135

136

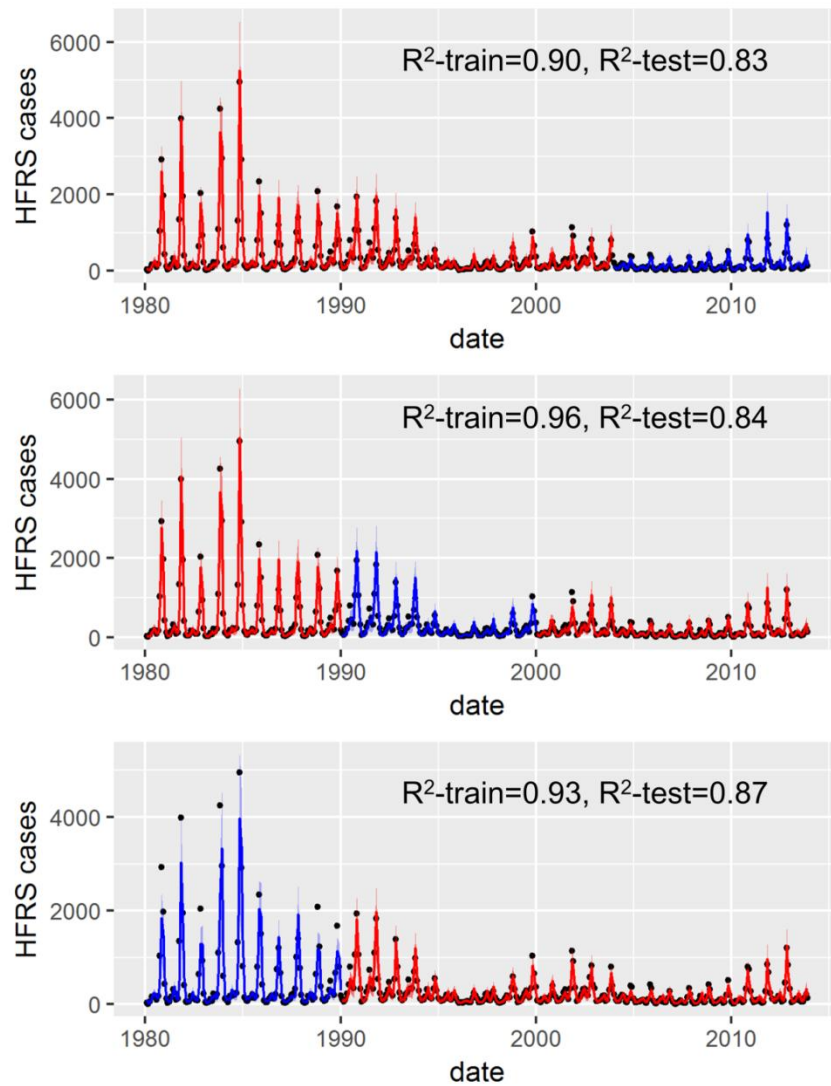

138

139 **Fig. S5** Cross-validation. Observations are in black, fitted values are in red and  
 140 predictions are in blue. The average  $R^2$ -train and  $R^2$ -test of cross validation are 0.93  
 141 and 0.85, respectively. Upper panel: models trained on 1980–2003 data, and  
 142 predictions for 2004–2013; middle panel: models trained on 1980–1989 and 2000–  
 143 2013 data, and predictions for 1990–1999; lower panel: models trained on 1990–2013  
 144 data, and predictions for 1980–1989.

145

146

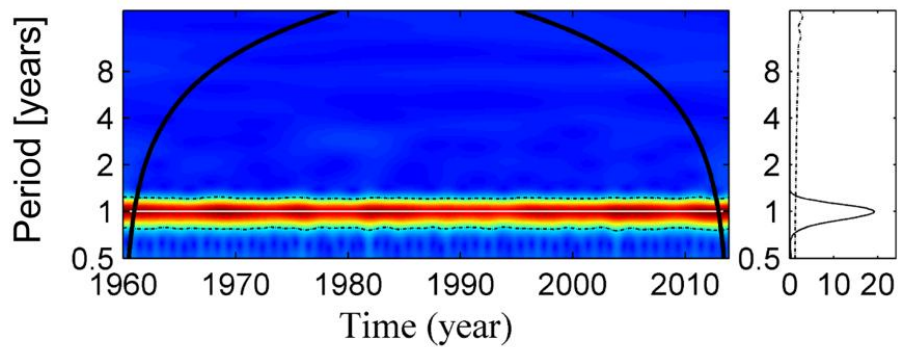

147

148 **Fig. S6** Wavelet power spectra showing the periodicity of the estimated transmission  
149 rate. (*Left*) wavelet power spectra and (*right*) global wavelet power spectra. In the  
150 wavelet power spectra, the dotted line corresponds to the 5% significance level, and  
151 the bold line is known as the cone of influence. The cone of influence delimits the  
152 effect of the treatment of the boundaries, the white lines materialize the maxima of the  
153 undulations of the wavelet power spectra, and the power values are color coded from  
154 blue (low values) to red (high values). The right panels show the mean spectrum  
155 (solid line) with its significant threshold value of 5% (dashed line).

156

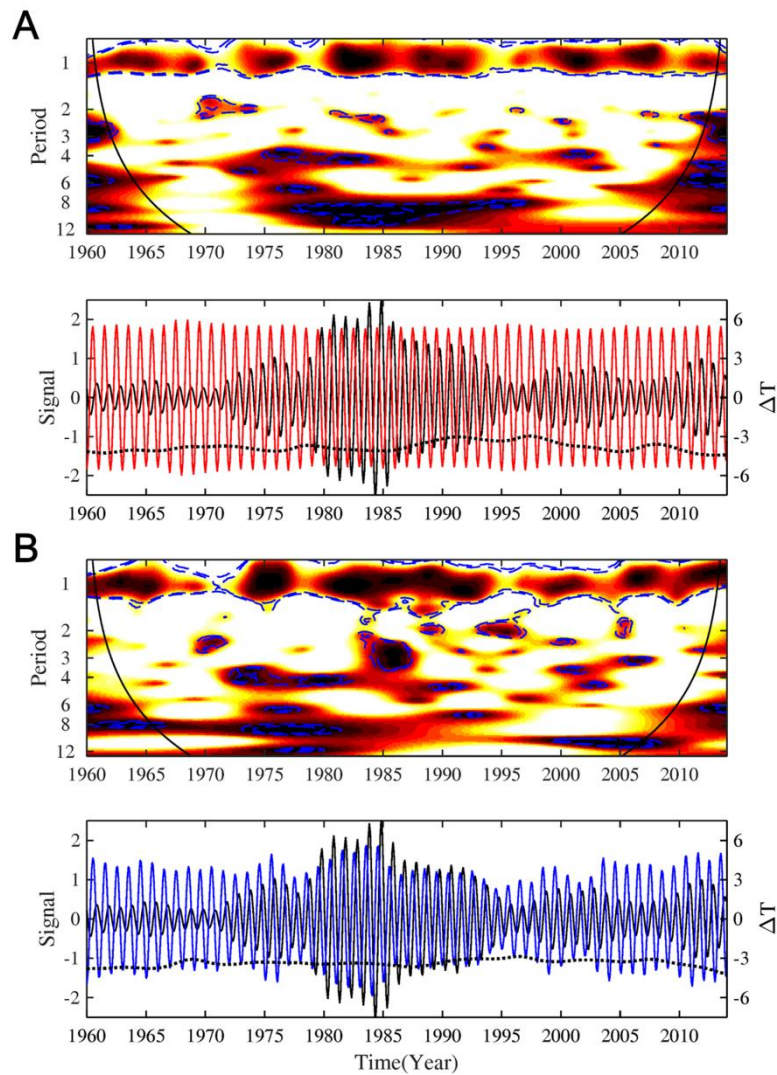

158

159 **Fig. S7** Association between climatic factors and number of HFRS cases. (A)

160 Association between average monthly temperature and hantavirus epidemics, wavelet

161 coherence; the panel below is the annual oscillating component (0.8-1.2 yr) evolutions

162 of the considered series computed with the wavelet transform. (B) Association

163 between rainfall and the number of HFRS cases, wavelet coherence; the panel below

164 is the annual oscillating component (0.8-1.2 yr) evolutions of the considered series

165 computed with the wavelet transform. The coherence power spectra (x-axis: time in

166 year; y-axis: period in year), where power is coded from a low value (white) to a high

167 value (dark red). The dotted black lines show the 5% significance level, computed on  
168 1,000 bootstrapped series. The inner area, within the cone of influence (black line),  
169 indicates the region not influenced by edge effects. Red line: temperature; blue line:  
170 rainfall; black lines: HFRS cases; dotted lines: instantaneous time difference between  
171 the oscillating components.

172

173

174

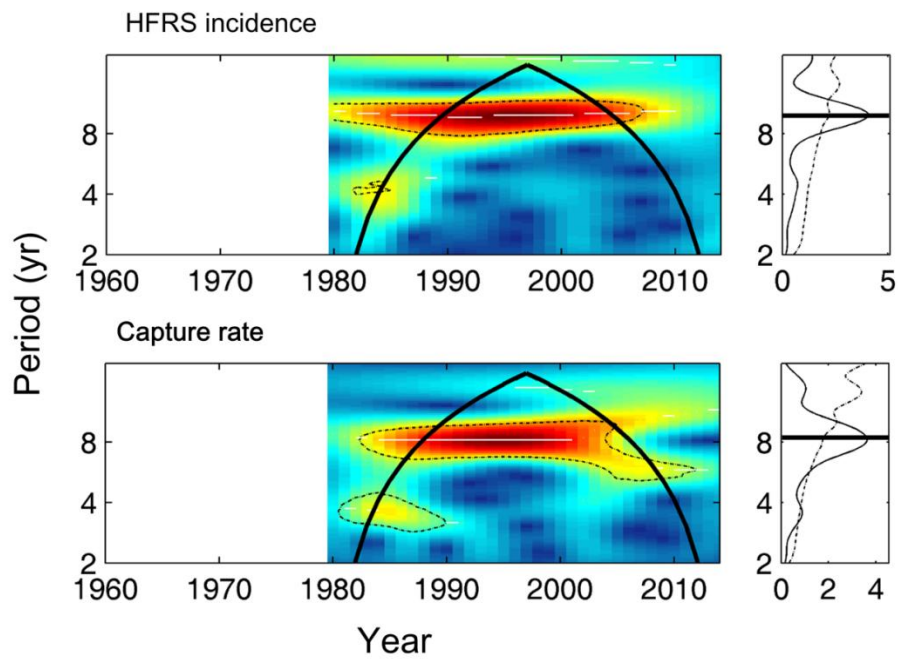

175

176 **Fig. S8** Wavelet power spectra showing the periodicity of the incidence of HFRS and

177 capture rate of *A. agrarius*, 1980–2013.

178

179

180  
181

**Table S1. Yearly and seasonal structural equation models for climate-linked HFRS epidemics in the Weihe Plain.**

| Climate variables |             | Standardized path coefficients |                            |                         |                     |                          | Indirect effect       |                          |                       | $\chi^2/df$ | RMSEA | CFI  |
|-------------------|-------------|--------------------------------|----------------------------|-------------------------|---------------------|--------------------------|-----------------------|--------------------------|-----------------------|-------------|-------|------|
| Rainfall          | Temperature | Rodent-1<br>↓<br>Rodent        | Temperature<br>↓<br>Rodent | Rainfall<br>↓<br>Rodent | Rodent<br>↓<br>HFRS | Temperature<br>↓<br>HFRS | Rainfall<br>↓<br>HFRS | Temperature<br>↓<br>HFRS | Rainfall<br>↓<br>HFRS |             |       |      |
| Spring            | Spring      | 0.48**                         | -0.18                      | 0.02                    | 0.92**              | -0.58**                  | -0.01                 | -0.17                    | 0.01                  | 6.66/4      | 0.14  | 0.94 |
| Spring            | Summer      | 0.48**                         | -0.43*                     | 0.02                    | 0.89**              | -0.78**                  | -0.01                 | -0.39*                   | 0.01                  | 6.69/4      | 0.14  | 0.95 |
| Spring            | Autumn      | 0.46**                         | -0.14                      | 0.02*                   | 0.89**              | -0.65**                  | 0.01                  | -0.12                    | 0.02*                 | 27.72/4     | 0.42  | 0.63 |
| Spring            | Winter-1    | 0.48**                         | -0.13                      | 0.02                    | 1.02**              | 0.10                     | -0.01                 | -0.14                    | 0.02                  | 7.31/4      | 0.16  | 0.92 |
| Spring            | Yearly-1    | 0.37**                         | -0.79**                    | 0.02**                  | 0.77**              | -1.14**                  | 0.002                 | -0.61**                  | 0.02**                | 9.17/4      | 0.20  | 0.91 |
| Summer            | Summer      | 0.53**                         | -0.44*                     | 0.001                   | 0.85**              | -0.77**                  | 0.001                 | -0.37*                   | 0.001                 | 13.89/4     | 0.27  | 0.82 |
| Summer            | Spring      | 0.51**                         | -0.21                      | 0.01                    | 0.85**              | -0.52**                  | 0.01                  | -0.18                    | 0.01                  | 4.99/4      | 0.08  | 0.98 |
| Summer            | Autumn      | 0.59**                         | 0.21                       | 0.01                    | 0.89**              | -0.58**                  | 0.01*                 | 0.19                     | 0.01                  | 8.73/74     | 0.19  | 0.90 |
| Summer            | Winter-1    | 0.54**                         | -0.03                      | 0.01                    | 0.95**              | 0.13                     | 0.01*                 | -0.03                    | 0.01                  | 6.90/4      | 0.14  | 0.92 |
| Summer            | Yearly-1    | 0.46**                         | -0.57*                     | 0.01                    | 0.77**              | -1.05**                  | 0.01                  | -0.44*                   | 0.004                 | 7.77/4      | 0.17  | 0.92 |
| Autumn            | Autumn      | 0.61**                         | 0.32                       | 0.01                    | 0.90**              | -0.41*                   | 0.01*                 | 0.28                     | 0.01                  | 14.27/4     | 0.28  | 0.81 |
| Autumn            | Spring      | 0.50**                         | -0.22                      | 0.004                   | 0.84**              | -0.50**                  | 0.02**                | -0.19                    | 0.003                 | 4.83/4      | 0.07  | 0.98 |
| Autumn            | Summer      | 0.53**                         | -0.47*                     | -0.001                  | 0.85**              | -0.65**                  | 0.01                  | -0.40*                   | -0.001                | 11.15/4     | 0.23  | 0.87 |
| Autumn            | Winter-1    | 0.53**                         | -0.02                      | 0.004                   | 0.95**              | 0.33                     | 0.02**                | -0.02                    | 0.004                 | 11.52/4     | 0.24  | 0.85 |
| Autumn            | Yearly-1    | 0.46**                         | -0.67**                    | -0.002                  | 0.79**              | -0.93**                  | 0.01                  | -0.53**                  | -0.002                | 14.79/4     | 0.28  | 0.82 |
| Winter-1          | Winter-1    | 0.54**                         | -0.09                      | -0.03                   | 0.98**              | 0.09                     | 0.04                  | -0.09                    | -0.03                 | 5.00/4      | 0.09  | 0.97 |
| Winter-1          | Spring      | 0.52**                         | -0.22                      | -0.03                   | 0.88**              | -0.55**                  | 0.04                  | -0.20                    | -0.03                 | 4.03/4      | 0.02  | 0.99 |
| Winter-1          | Summer      | 0.53**                         | -0.44*                     | -0.02                   | 0.86**              | -0.83**                  | 0.05                  | -0.37*                   | -0.02                 | 5.11/4      | 0.09  | 0.98 |

|          |          |        |        |         |        |         |        |        |         |         |      |      |
|----------|----------|--------|--------|---------|--------|---------|--------|--------|---------|---------|------|------|
| Winter-1 | Autumn   | 0.61** | 0.22   | -0.03   | 0.92** | -0.58** | 0.04   | 0.20   | -0.03   | 8.60/4  | 0.19 | 0.90 |
| Winter-1 | Yearly-1 | 0.47** | -0.62* | -0.03   | 0.79** | -1.10** | 0.03   | -0.49* | -0.03   | 5.70/4  | 0.11 | 0.97 |
| Yearly-1 | Yearly-1 | 0.43** | -0.34  | 0.003** | 0.77** | -1.08** | 0.001  | -0.26  | 0.002** | 13.16/4 | 0.26 | 0.85 |
| Yearly-1 | Spring   | 0.42** | -0.26  | 0.004** | 0.76** | -0.58** | 0.003* | -0.19  | 0.003** | 6.18/4  | 0.13 | 0.96 |
| Yearly-1 | Summer   | 0.46** | -0.28  | 0.003** | 0.82** | -0.76** | 0.001  | -0.23  | 0.003** | 10.45/4 | 0.22 | 0.89 |
| Yearly-1 | Autumn   | 0.58** | 0.59** | 0.005** | 0.90** | -0.54** | 0.001  | 0.53** | 0.005** | 16.68/4 | 0.31 | 0.79 |
| Yearly-1 | Winter-1 | 0.46** | 0.04   | 0.004** | 0.89** | 0.12    | 0.002  | 0.03   | 0.003** | 8.09/4  | 0.17 | 0.91 |

182 \* with significant effect, -1 previous year. Normalized chi-square (model chi-square divided by the degrees of freedom,  $\chi^2/df$ ) was used as a  
183 model test statistic, to verify whether the covariance matrix implied by conceptual model is close enough to the sample matrix that the  
184 differences may be reasonably considered as due to sampling error. AIC: the Akaike Information Criterion. BIC: the Bayesian information  
185 criterion. RMSEA: root mean-square error of approximation. CFI: comparative fit index.  
186



187 **Table S2. Parameter estimates for the selected best model of rodent population**

| Parameters                              | Edf* | F     | <i>P</i> -value |
|-----------------------------------------|------|-------|-----------------|
| $N_{y-1}$ , rodent density              | 2.72 | 4.26  | <0.05           |
| $T_{y-1}^{winter}$ , winter temperature | 4.49 | 2.61  | <0.10           |
| $R_{y-1}$ , annual rainfall             | 1.00 | 8.331 | <0.05           |

188 Approximate significance of smoothed terms is given as the *P* values.

189 \*Edf is the estimated degree of freedom of the examined covariate. An Edf equal to 1 implies a

190 linear effect and values greater than 1 indicate a progressively stronger nonlinear effect.

191

192

193 **Table S3. Posterior estimates, standard deviations (S.D.) for the parameters of**

194 **the human hantavirus transmission model**

195

| Parameters     | Estimate | S.D.    |
|----------------|----------|---------|
| $\delta_1$     | 1.23E-4  | 8.31E-5 |
| $\delta_2$     | 5.10E-4  | 1.01E-4 |
| $\delta_3$     | -2.50E-3 | 2.00E-3 |
| $\delta_4$     | -1.13E-2 | 3.56E-3 |
| $\alpha_1$     | 0.75     | 0.03    |
| $\alpha_2$     | 0.06     | 0.01    |
| $\varepsilon$  | 0.47     | 0.11    |
| $\tau$         | 0.06     | 0.07    |
| $\varphi_1$    | 4.79     | 1.18    |
| $\varphi_2$    | 8.14     | 1.58    |
| $\varphi_3$    | 9.21     | 1.7     |
| $\varphi_4$    | 14.67    | 3.39    |
| $\varphi_5$    | 15.02    | 4.12    |
| $\varphi_6$    | 12.01    | 3.44    |
| $\varphi_7$    | 9.69     | 2.06    |
| $\varphi_8$    | 13.8     | 3.68    |
| $\varphi_9$    | 72.61    | 16.86   |
| $\varphi_{10}$ | 81.85    | 18.96   |
| $\varphi_{11}$ | 24.76    | 6.62    |
| $\varphi_{12}$ | 7.57     | 1.61    |

196

197

198
